# Supplementary material for: Synthesis and characteristics of novel, high-nitrogen 1,2,4-oxadiazoles
Source: Royal Society of Chemistry journal article supplement (doi:10.1039/c4ra00255e), 2014-01-01
Supplement: c4ra00255e1.pdf [file c4ra00255e1.pdf]

## Supporting Information

### Synthesis and Characteristics of High-Nitrogen 1,2,4-Oxadiazoles

Zhanda Fu, Yang Wang, Li Yang, Rui Su, Jun Chen, Fude Nie, Jinglun Huang and Fu-Xue Chen\*  
[fuxue.chen@bit.edu.cn](mailto:fuxue.chen@bit.edu.cn)

|                                                    |    |
|----------------------------------------------------|----|
| General.....                                       | S1 |
| AOG, AOG <sub>2</sub> Tz.....                      | S2 |
| MOPAC calculation of AOG, AOG <sub>2</sub> Tz..... | S2 |
| Spectra of AOG, AOG <sub>2</sub> Tz.....           | S4 |

#### General

<sup>1</sup>H and <sup>13</sup>C NMR spectra are recorded on Bruker Advance 400 spectrometer at 400 and 100 MHz, respectively. Chemical shifts are reported in ppm relative to TMS. The solvent is [D<sub>6</sub>]dimethyl sulfoxide (DMSO-*d*<sub>6</sub>) unless otherwise specified. The melting, decomposition points is recorded with the peak value on a METTLER TOLEDO differential scanning calorimeter at a scan rate of 10 °C min<sup>-1</sup>, IR spectra is recorded on IR-408 using KBr pellets. ESI-MS is recorded and analyzed on Agilent 500-MS, Bruker Apex IV FTMS and Bruker Compass Data Analysis 4.0. NOG and BT are prepared refereeing to reported methods. Other materials are purchased from from Alfa Aesar. The crystal density is calculated by a patented method.<sup>1</sup>

### 3-azido-5-guanidino-1,2,4-oxadiazole (AOG)

To a solution of DMSO (4 mL), H<sub>2</sub>O (1 mL) and NaN<sub>3</sub> (195 mg, 3 mmol) is added NOG (344 mg, 2 mmol). The mixture is stirred with an overhead stirrer, heated to 50 °C for 5 h. The reaction is then poured into ice water (10 mL), the pale yellow precipitate is filtered, washed thoroughly with water and dried to give the product solid (120 mg, 36%). *T*<sub>dec.</sub>: 196 °C. <sup>1</sup>H NMR (400 MHz, DMSO-*d*<sub>6</sub>, TMS): δ<sub>H</sub> 7.14(NH<sub>2</sub>). <sup>13</sup>C NMR (100 MHz, DMSO-*d*<sub>6</sub>, TMS): δ<sub>C</sub> 174.6, 163.5, 159.8. IR (KBr): 3433, 3391, 3230, 3103, 2160, 1673, 1580, 1537, 1420, 1214, 974, 766, cm<sup>-1</sup>. Anal. Calcd for C<sub>3</sub>H<sub>4</sub>N<sub>8</sub>O, 168: C, 21.43; H, 2.37; N, 66.65; Found: C, 21.60; H, 2.37; N, 66.52.

### 3,6-bis(3'-azido-1',2',4'-oxadiazole-5'-guanyl)- 1,2,4,5-tetrazine (AOG<sub>2</sub>Tz)

AOG (252 mg, 1.5 mmol) is placed in an oven dried round-bottomed flask (50 mL) with a stir bar and dissolved in anhydrous dimethylformamide (20 mL). The solution is cooled to 0 °C and NaH (60% dispersion in oil, 92 mg, 3.3 mmol) is added portionwise over 5 min. The reaction is stirred for 30 min at 0 °C and BT (162 mg, 0.6 mmol) is added in one portion. The reaction is stirred at 0 °C for 1 h and then allowed to warm to room temperature for 4 h. The reaction is then poured into ice water (20 mL) and acidified to pH=1 by the addition of 3 N HCl. The brown-red precipitate is filtered, washed thoroughly with water and dried to give AOG<sub>2</sub>Tz (240 mg, 96.7%). *T*<sub>dec.</sub>: 210 °C. <sup>1</sup>H NMR (400 MHz, DMSO-*d*<sub>6</sub>): δ<sub>H</sub> 12.14 (bs, 2H), 9.05 (bs, 2H), 8.80(bs, 2H). <sup>13</sup>C NMR (100 MHz, DMSO-*d*<sub>6</sub>): δ<sub>C</sub> 154.9, 158.6, 164.0, 174.0. IR (KBr): 3372, 3262, 3212, 2153, 1635, 1538, 1367, 1294, 1194, 1050, 774, 610, cm<sup>-1</sup>. HRMS-ESI (414.1055): *m/z* positive mode, 415.1058 [M+H]<sup>+</sup>.

### Calculated total energy (E0), zero-point energy (ZPE), enthalpy of formation (HOF) of compound AOG and AOG<sub>2</sub>Tz

Isodesmic reactions for compound AOG and AOG<sub>2</sub>Tz

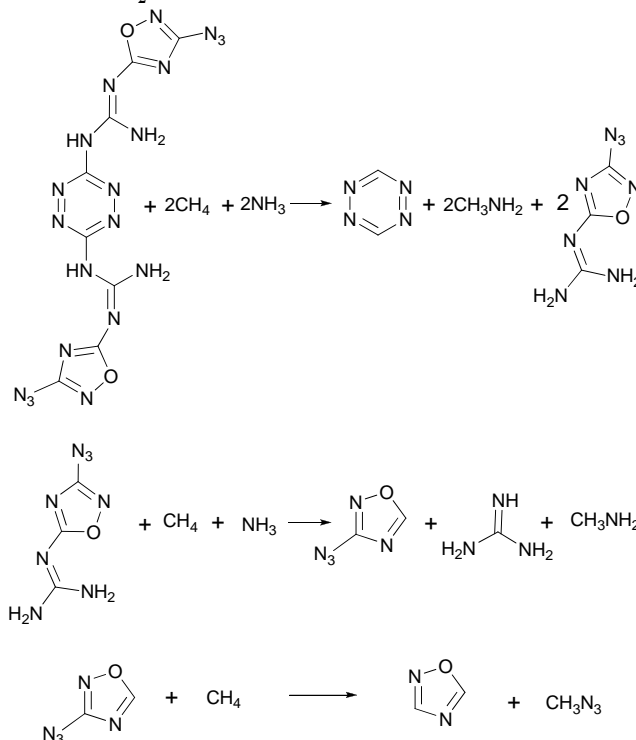

First, we calculated the heat of formation of each molecule according to following formulation:

heat of formation of each molecule at 0K:

$$\Delta_f H^0(M, 0K) = \sum_{atoms} x \Delta_f(X, 0K) - \sum D_0(M)$$
$$= \sum_{atoms} x \Delta_f(X, 0K) - \left( \sum_{atoms} x \varepsilon_0(X) - \varepsilon_0(M) - \varepsilon_{zpe}(M) \right)$$

Here, M represents the molecule, X represents atom.

Here, except the enthalpy of atom, other energy all are calculated by first-principle. The Experimental enthalpy values of atom are taken from J. Chem. Phys. **106**, 1063 (1997).

Heat of formation of each molecule at 298K:

$$\Delta_f H^0(M, 298K) = \Delta_f H^0(M, 0K) + (H_M^0(298K) - H_M^0(0K))$$
$$- \sum_{atoms} x (H_X^0(298K) - H_X^0(0K))$$

Here, (H(298K)-H(0)) are thermal correction of the heat of formation for molecule or atom, respectively.

Second, we calculated the reaction enthalpy of isodesmic reactions. It equals to the enthalpy difference between the substrate and product.

We also calculated heat of formation for some small molecule, such as CH<sub>4</sub>. Our calculated formation of heat also is agreement well with experiment.

For more information on the calculation formulation, you can refer the webpage:  
[http://www.gaussian.com/g\\_whitepap/thermo.htm#SECTION00053000000000000000](http://www.gaussian.com/g_whitepap/thermo.htm#SECTION00053000000000000000)

All the calculations are done at the semi-empirical level using the PM6 method<sup>2</sup> implemented in the MOPAC package<sup>3</sup>. The heat of formation is obtained at the room temperature (298.15K) through the atomization reaction.

*Table S1* Calculated heats of formation by MOPAC

| Compd.                   | E <sub>0</sub> /ev | ZPE/ev        | HOF/(KJ mol <sup>-1</sup> ) |
|--------------------------|--------------------|---------------|-----------------------------|
| <b>AOG</b>               | -2367.64277        | 2.60549941449 | 235.07941                   |
| <b>AOG<sub>2</sub>Tz</b> | -5667.81698        | 5.60450188663 | 957.34882                   |

#### **References**

1. Y.-K. Wu, D.-Y. Chen, H.-S. Dong, *Chinese Patent*, 2011, CN101957300A.
2. J. J. P. Stewart, *J. Mol. Modeling*, 2007, **13**, 1173-1213.
3. MOPAC2009, J. J. P. Stewart, *Stewart Computational Chemistry*, Colorado Springs: CO, USA, [HTTP://OpenMOPAC.net](http://OpenMOPAC.net) (2008).

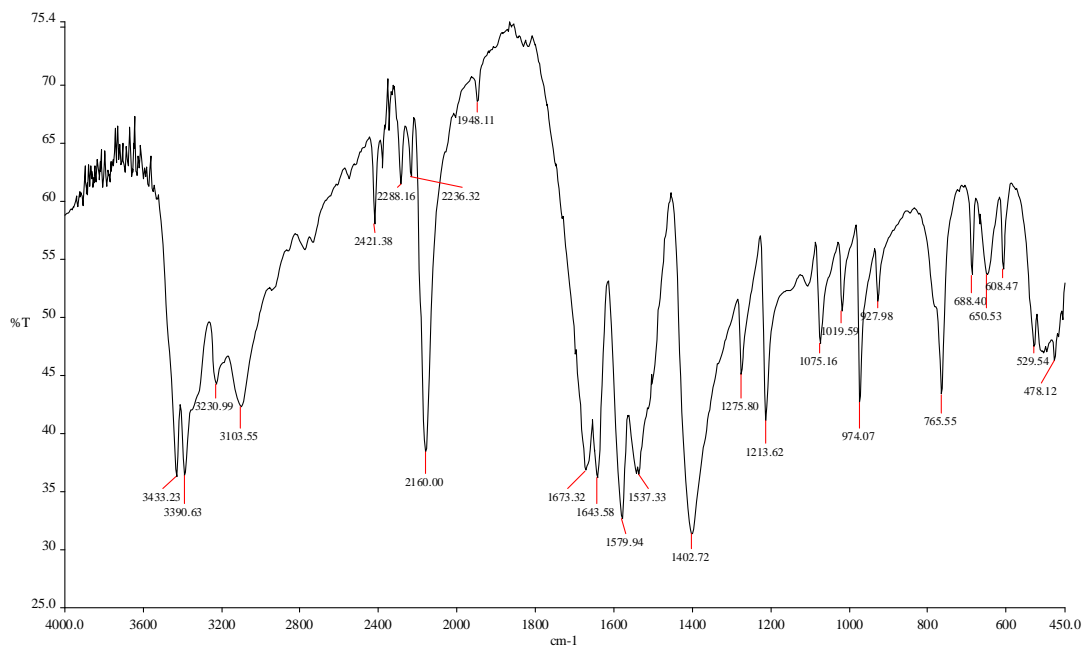

Figure S1 IR spectra of of AOG

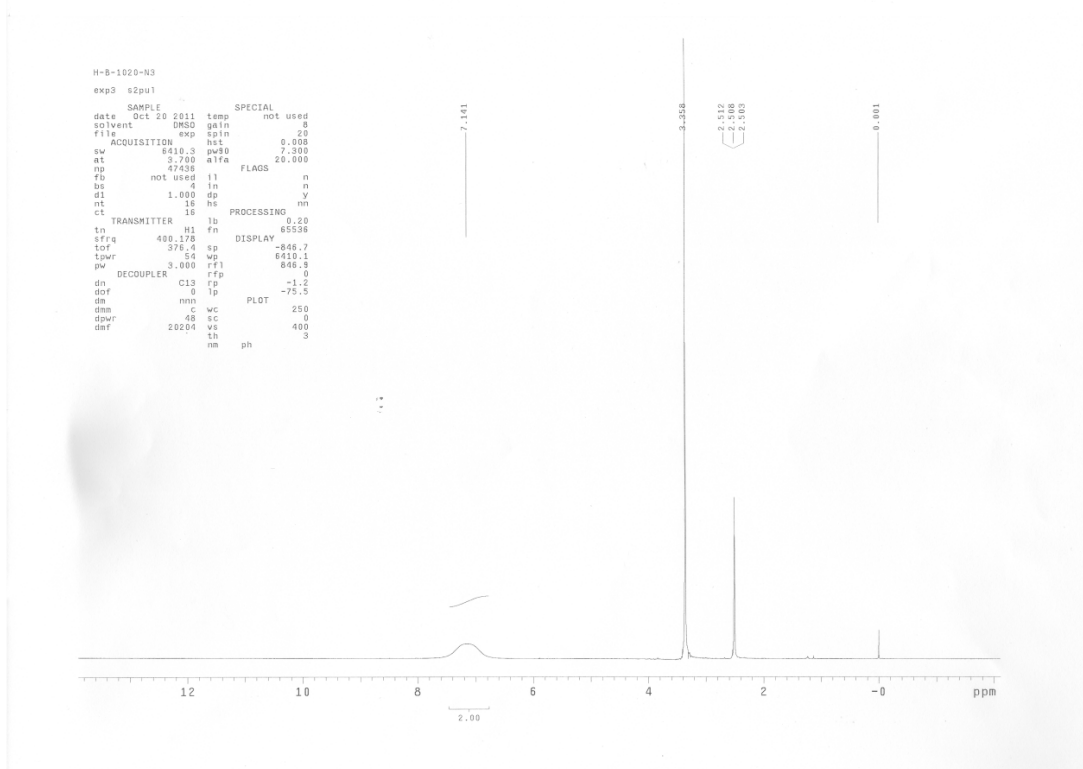

Figure S2 <sup>1</sup>H NMR of AOG

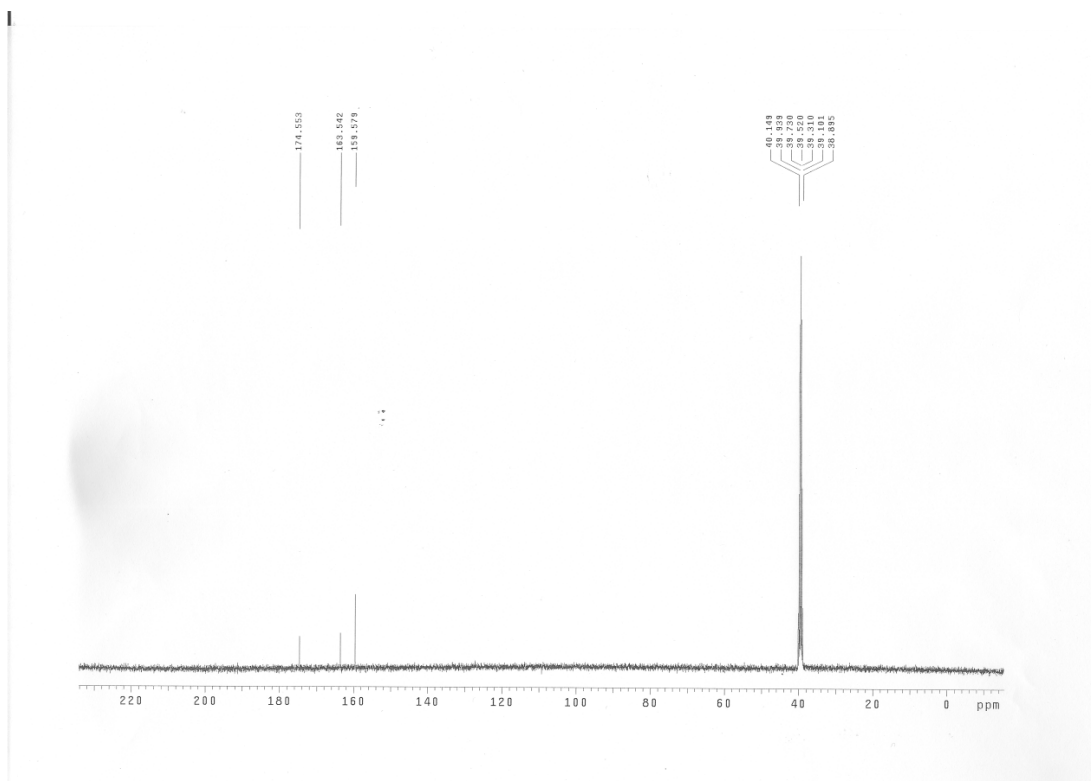

**Figure S3**  $^{13}\text{C}$  NMR of AOG

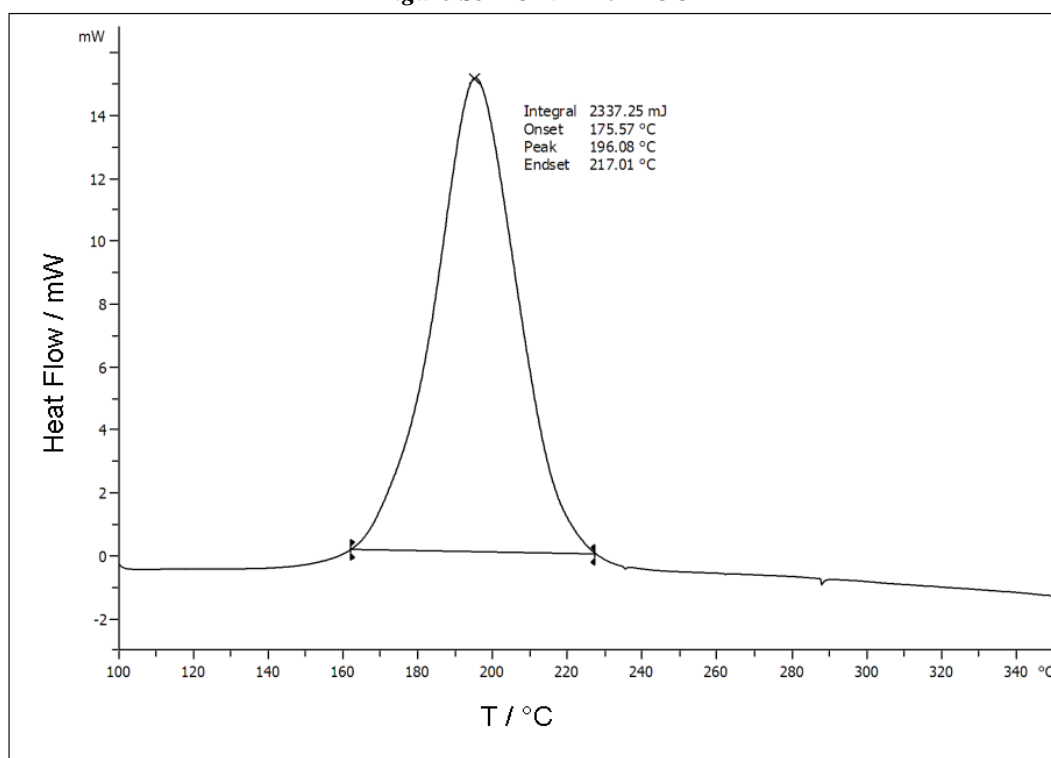

**Figure S4** DSC of AOG

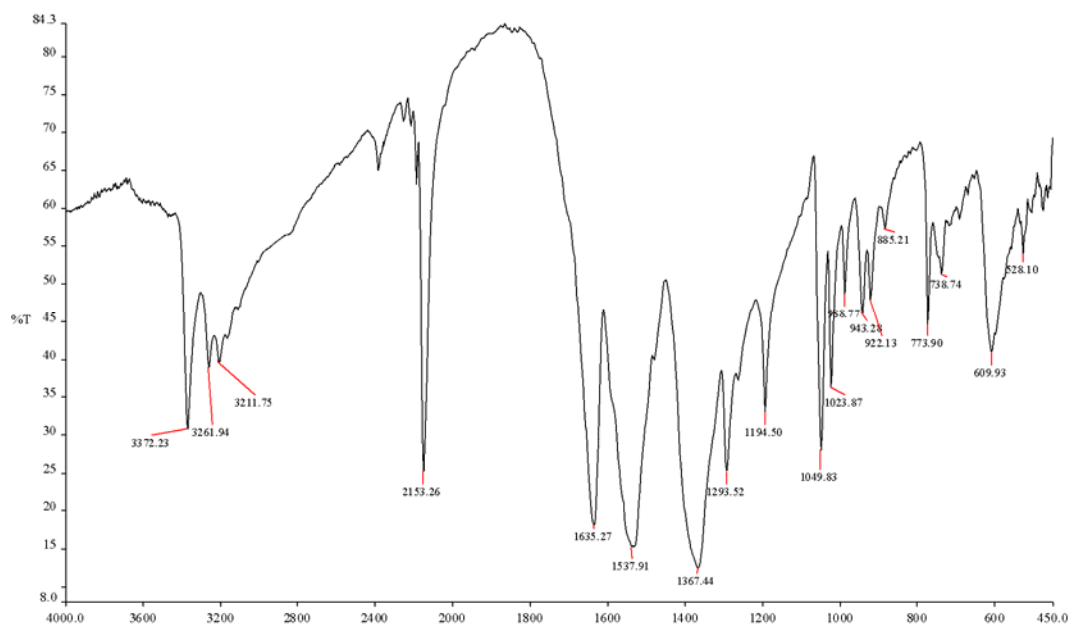

Figure S5 IR spectra of of AOG<sub>2</sub>Tz

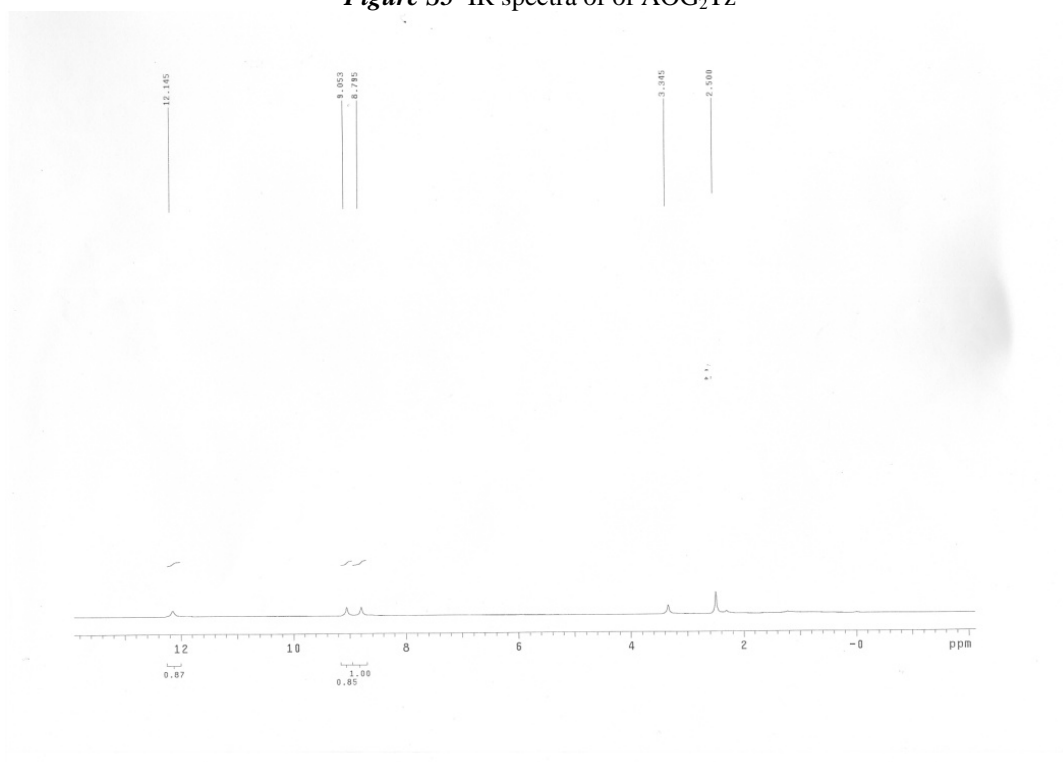

Figure S6 <sup>1</sup>H NMR of AOG<sub>2</sub>Tz

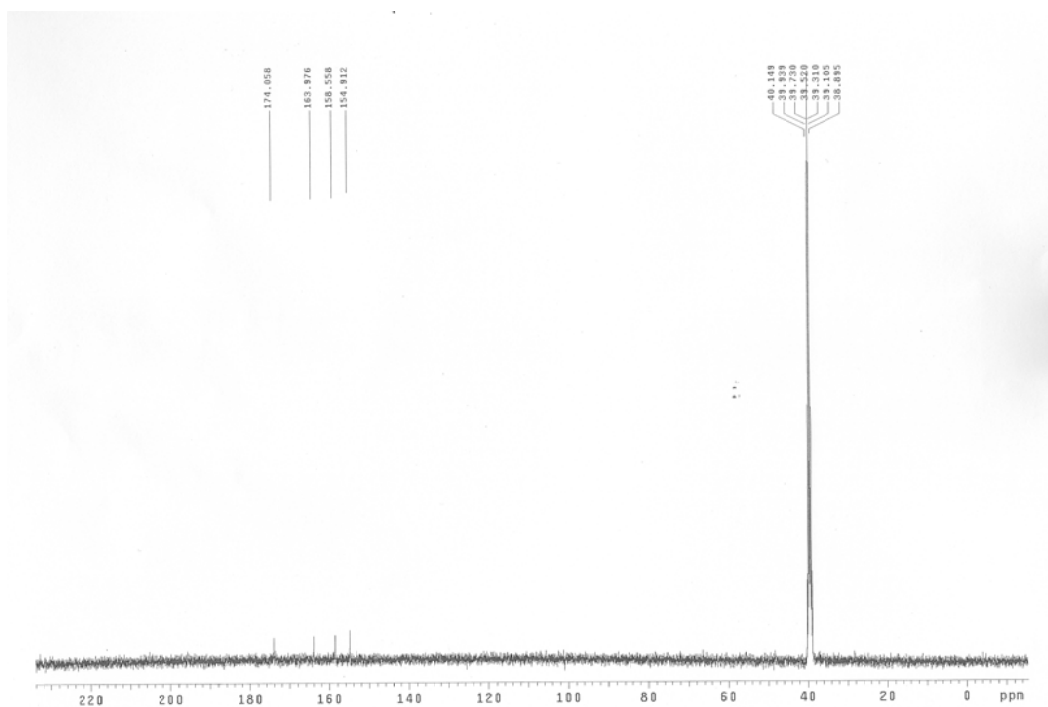

Figure S7  $^1\text{H}$  NMR of AOG<sub>2</sub>Tz

Peking University Mass Spectrometry Sample Analysis Report

|                      |                            |                         |                       |
|----------------------|----------------------------|-------------------------|-----------------------|
| <b>Analysis Info</b> |                            | <b>Acquisition Date</b> | 11/21/2011 4:14:42 PM |
| Analysis Name        | 11110869_20111121_000001.d | Instrument              | Bruker Apex IV FTMS   |
| Sample               | AOG <sub>2</sub> Tz        | Operator                | Peking University     |
| Comment              | ESI Positive               |                         |                       |

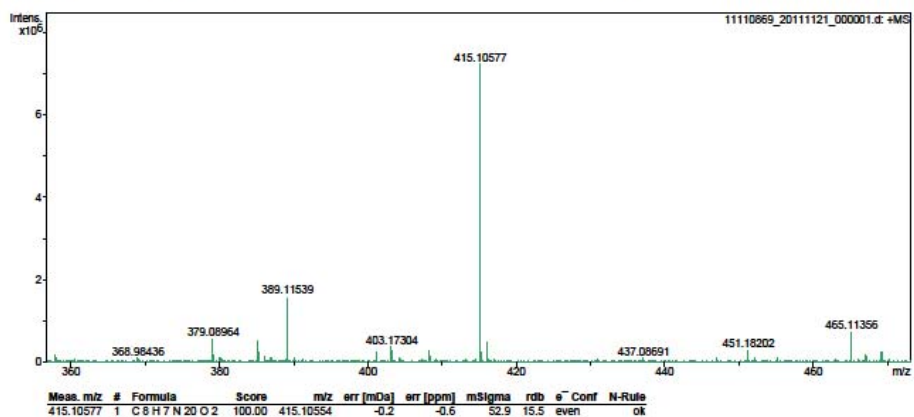

Figure S8 HRMS of AOG<sub>2</sub>Tz

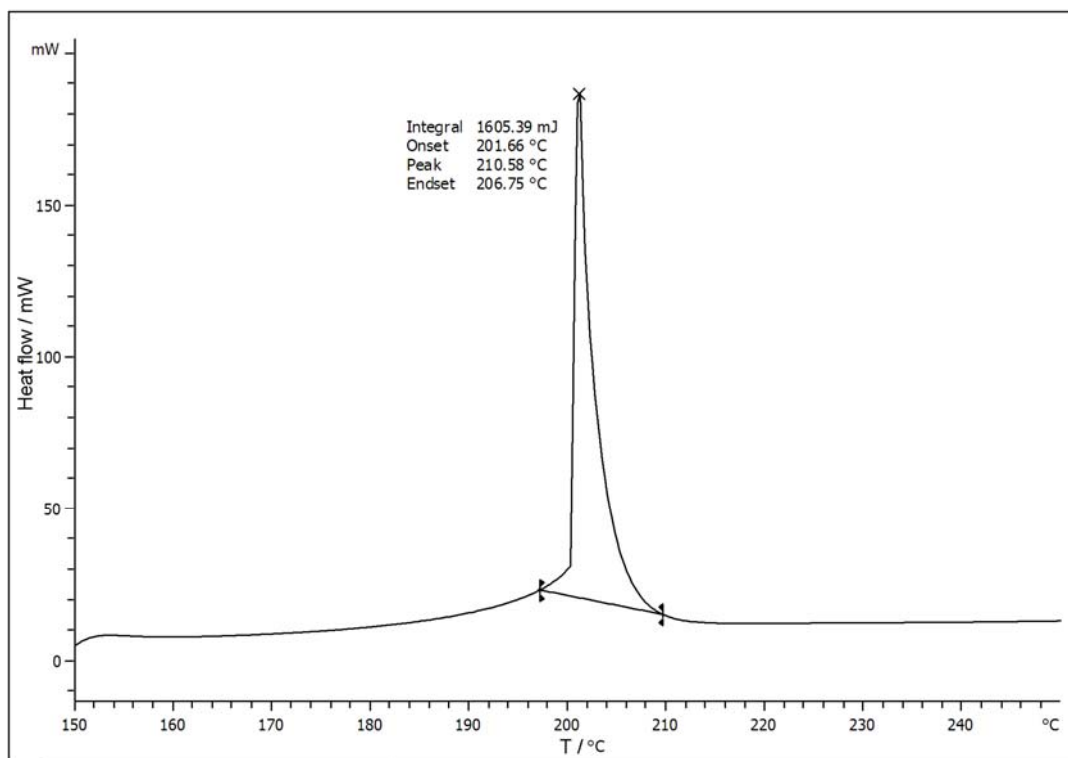

*Figure S9* DSC of AOG<sub>2</sub>Tz
